# Supplementary figures and images for: The differential modulatory effects ofEurotium cristatumon the gut microbiota of obese dogs and mice are associated with improvements in metabolic disturbances
Source: Royal Society of Chemistry journal article supplement (doi:10.1039/d1fo02886c), 2021-01-01

**a**

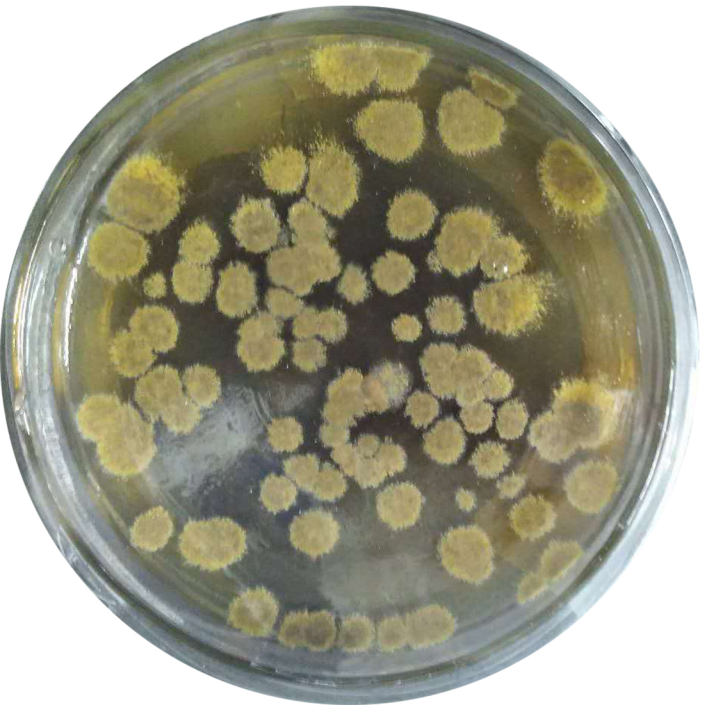

**b**

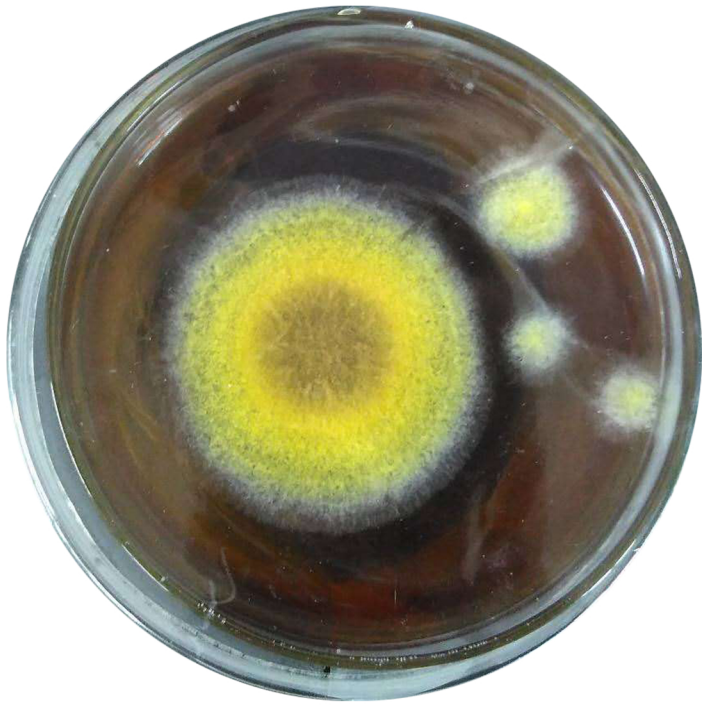

Supplement: d1fo02886c2.pdf [file d1fo02886c2.pdf]
